# Supplementary material
Source: PubMed Central journal article supplement (PMC6278977)
Supplement: 2018_192534-Disclosures_and_Contributions.pdf [file 2018_192534-Disclosures_and_Contributions.pdf]

Haematologica  
HAEMATOL/2018/192534  
Version 3

A double Philadelphia chromosome-positive chronic myeloid leukemia patient, co-expressing P210BCR-ABL1 and P195BCR-ABL1 isoforms

Raquel Vinhas, Alexandra Lourenço, Susana Santos, Patrícia Ribeiro, Madalena Silva, Aida Botelho de Sousa, Pedro V. Baptista, and Alexandra R. Fernandes

Disclosures: none

Contributions: RV, AL, SS, MS, PR performed the work and drafted the manuscript, ARF, PVB and ABS design and coordinated the work and reviewed the manuscript.
